# Supplementary material for: Regnase-1 Deficiency Restrains Klebsiella pneumoniae Infection by Regulation of a Type I Interferon Response
Source: PubMed Central journal article supplement (PMC8805030; doi:10.1128/mbio.03792-21), 2022-02-01

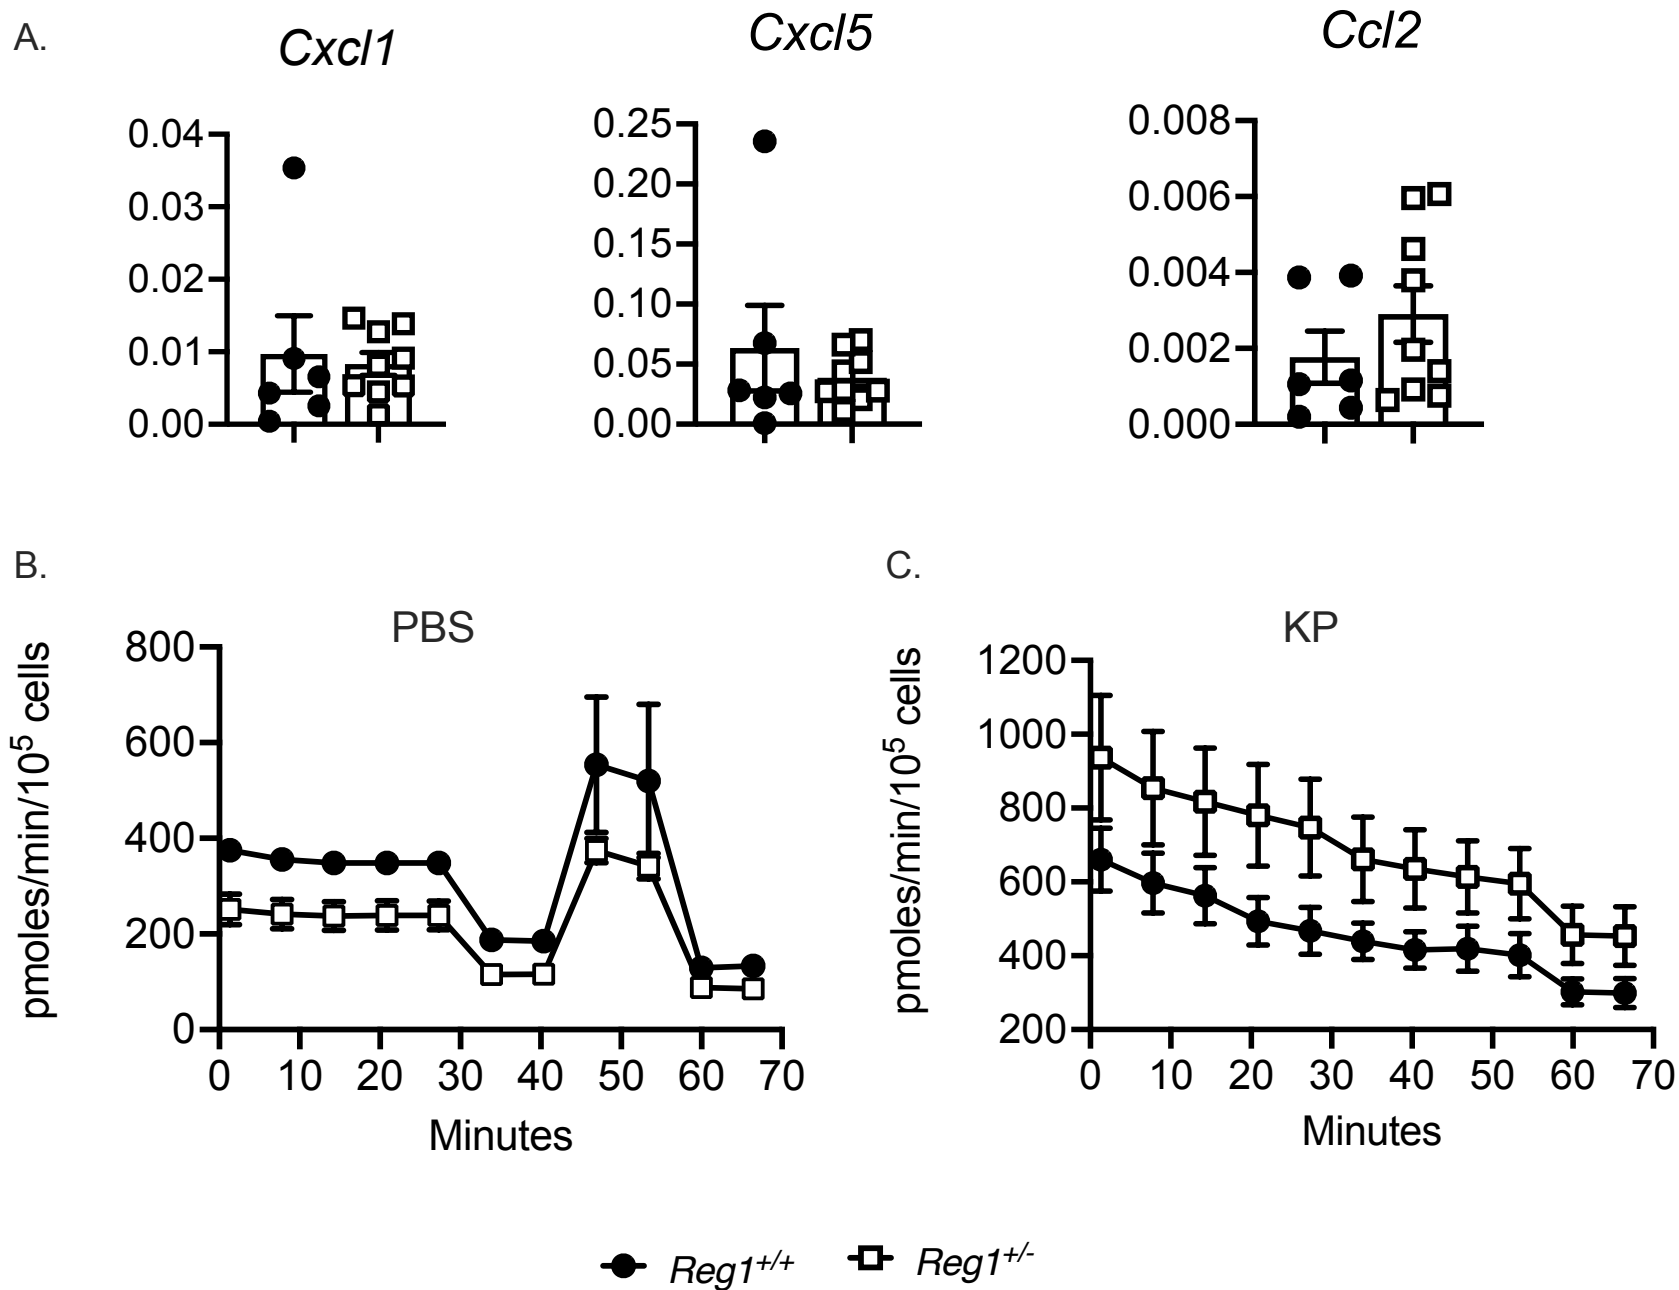

Supplement: mbio.03792-21-sf001.pdf [file mbio.03792-21-sf001.pdf]
